# Supplementary material for: An α-CrPO4-type NaV3(PO4)3 anode for sodium-ion batteries with excellent cycling stability and the exploration of sodium storage behavior
Source: Royal Society of Chemistry journal article supplement (doi:10.1039/c6ta10862h), 2017-01-01
Supplement: c6ta10862h1.pdf [file c6ta10862h1.pdf]

## Supporting Information

### **An $\alpha$ -CrPO<sub>4</sub>-type NaV<sub>3</sub>(PO<sub>4</sub>)<sub>3</sub> anode for sodium-ion batteries with excellent cycling stability and the exploration of sodium storage behavior**

Xiaofang Wang,<sup>a, f,†</sup> Pu Hu,<sup>b,e,†</sup> Lanli Chen,<sup>a</sup> Yan Yao,<sup>e</sup> Qingyu Kong,<sup>c,\*</sup> Guanglei Cui,<sup>b,\*</sup> Siqi Shi,<sup>a,f,\*</sup> Liquan Chen<sup>d</sup>

<sup>a</sup> School of Materials Science and Engineering, Shanghai University, Shanghai 200444, P. R. China

<sup>b</sup> Qingdao Industrial Energy Storage Research Institute, Qingdao Institute of Bioenergy and Bioprocess Technology, Chinese Academy of Sciences, Qingdao 266101, P. R. China

<sup>c</sup> Société civile Synchrotron SOLEIL, L'Orme des Merisiers, Saint-Aubin - BP 48, 91192 GIF-sur-YVETTE CEDEX, France

<sup>d</sup> Beijing National Laboratory for Condensed Matter Physics, Institute of Physics, Chinese Academy of Sciences, Beijing 100190, P. R. China

<sup>e</sup> Department of Electrical and Computer Engineering and Materials Science and Engineering Program, University of Houston, Houston, TX 77204, USA

<sup>f</sup> Materials Genome Institute, Shanghai University, Shanghai 200444, P. R. China

† These authors contributed equally to this work.

\*Email address: [kong@synchrotron-soleil.fr](mailto:kong@synchrotron-soleil.fr); [cuiql@qibebt.ac.cn](mailto:cuiql@qibebt.ac.cn); [sqshi@shu.edu.cn](mailto:sqshi@shu.edu.cn)

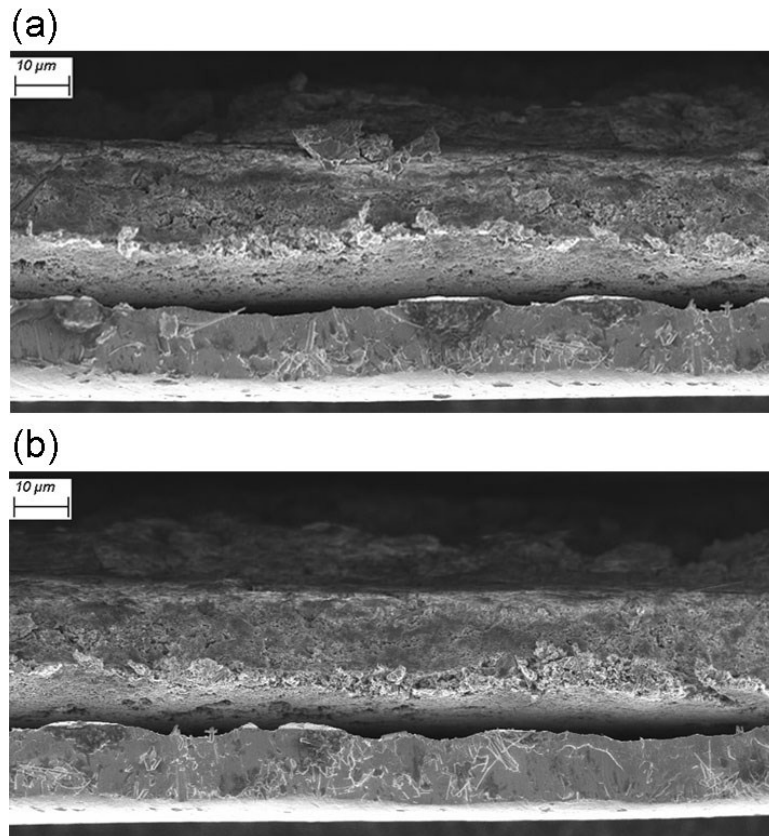

**Figure S1.** Cross-section SEM image of the  $\text{NaV}_3(\text{PO}_4)_3$  anode before (a) and after (b) sodiation.

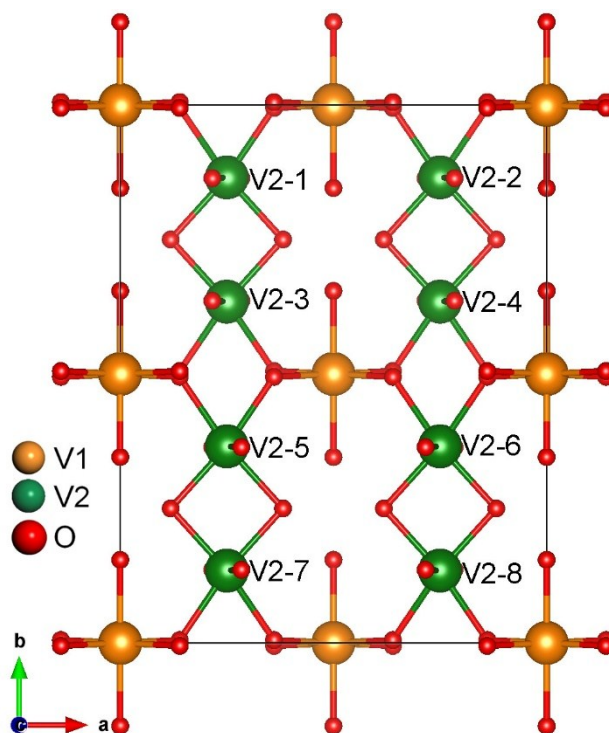

**Figure S2.** The distribution of V in  $\text{NaV}_3(\text{PO}_4)_3$  project on (001) and the corresponding magnetization moment are shown in Table S1.

**Table S1** Eight kinds of initial and calculated magnetic moment distributions for different valence states of V2 (8g sites) in  $\text{NaV}_3(\text{PO}_4)_3$ . The magnetization moment of V1 (4a sites,  $\text{V}^{3+}$ ) is listed as a reference and the calculations are performed in the unit cell. The energy for the non-magnetic structure is -530.575 eV. ( $U-J=4.2$  eV)

| Mag.      | V1    | V2-1  | V2-2  | V2-3  | V2-4  | V2-5  | V2-6  | V2-7  | V2-8  | Energy (eV) |
|-----------|-------|-------|-------|-------|-------|-------|-------|-------|-------|-------------|
| 1-Initial | 2     | 3     | 2     | 2     | 3     | 3     | 2     | 2     | 3     |             |
| 1-Calc.   | 2.032 | 2.866 | 2.025 | 2.025 | 2.866 | 2.866 | 2.025 | 2.025 | 2.866 | -557.210    |
| 2-Initial | 2     | 2     | 3     | 3     | 2     | 2     | 3     | 3     | 2     |             |
| 2-Calc.   | 2.032 | 2.025 | 2.865 | 2.865 | 2.025 | 2.025 | 2.865 | 2.865 | 2.025 | -557.209    |
| 3-Initial | 2     | 2     | 2     | 3     | 3     | 3     | 3     | 2     | 2     |             |
| 3-Calc.   | 2.037 | 2.470 | 2.468 | 2.478 | 2.476 | 2.476 | 2.478 | 2.468 | 2.470 | -556.466    |
| 4-Initial | 2     | 3     | 3     | 2     | 2     | 2     | 2     | 3     | 3     |             |
| 4-Calc.   | 2.037 | 2.469 | 2.468 | 2.479 | 2.477 | 2.477 | 2.479 | 2.468 | 2.469 | -556.466    |
| 5-Initial | 2     | 2     | 2     | 3     | 3     | 2     | 2     | 3     | 3     |             |
| 5-Calc.   | 2.035 | 2.867 | 2.866 | 2.022 | 2.022 | 2.866 | 2.867 | 2.022 | 2.022 | -557.241    |
| 6-Initial | 2     | 3     | 3     | 2     | 2     | 3     | 3     | 2     | 2     |             |
| 6-Calc.   | 2.035 | 2.867 | 2.866 | 2.022 | 2.022 | 2.866 | 2.867 | 2.022 | 2.022 | -557.329    |
| 7-Initial | 2     | 2     | 3     | 3     | 2     | 3     | 2     | 2     | 3     |             |
| 7-Calc.   | 2.037 | 2.508 | 2.438 | 2.440 | 2.506 | 2.438 | 2.508 | 2.506 | 2.440 | -556.467    |
| 8-Initial | 2     | 3     | 2     | 2     | 3     | 2     | 3     | 3     | 2     |             |
| 8-Calc.   | 2.037 | 2.460 | 2.486 | 2.488 | 2.459 | 2.486 | 2.460 | 2.459 | 2.488 | -556.466    |

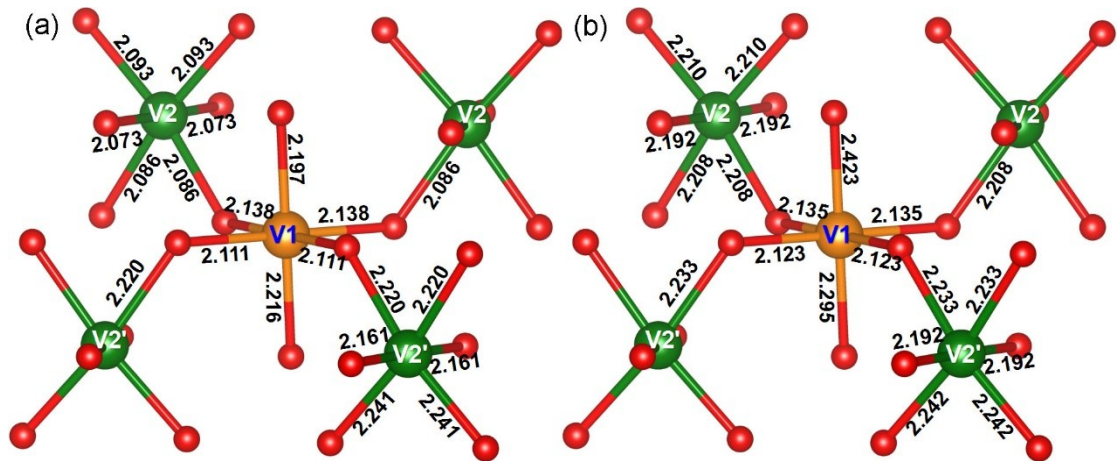

**Figure S3.** Local distribution and atomic positions around different V in (a)  $\text{Na}_2\text{V}_3(\text{PO}_4)_3$  and (b)  $\text{Na}_3\text{V}_3(\text{PO}_4)_3$  obtained from GGA+U calculations.

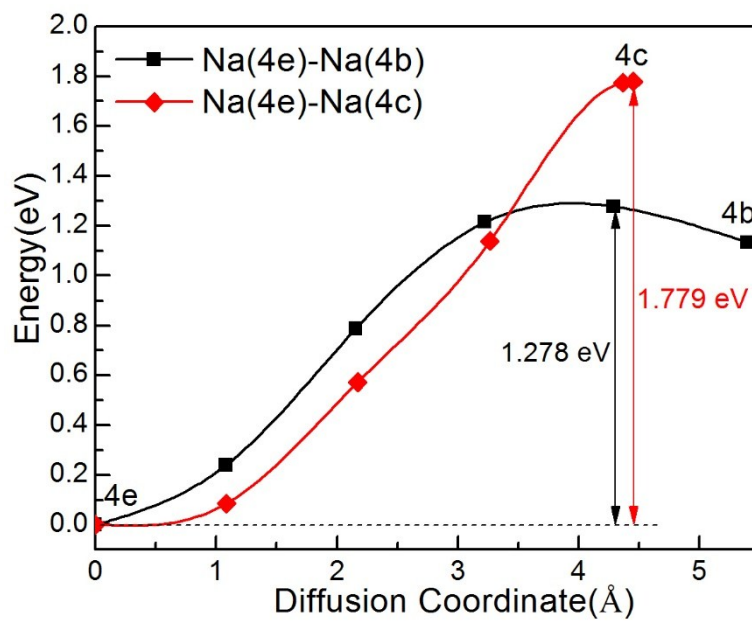

**Figure S4.** The energy barriers for two  $\text{Na}^+$  in one channel diffusion from 4e sites to 4b (or 4c) sites in  $\text{NaV}_3(\text{PO}_4)_3$  at the same time.

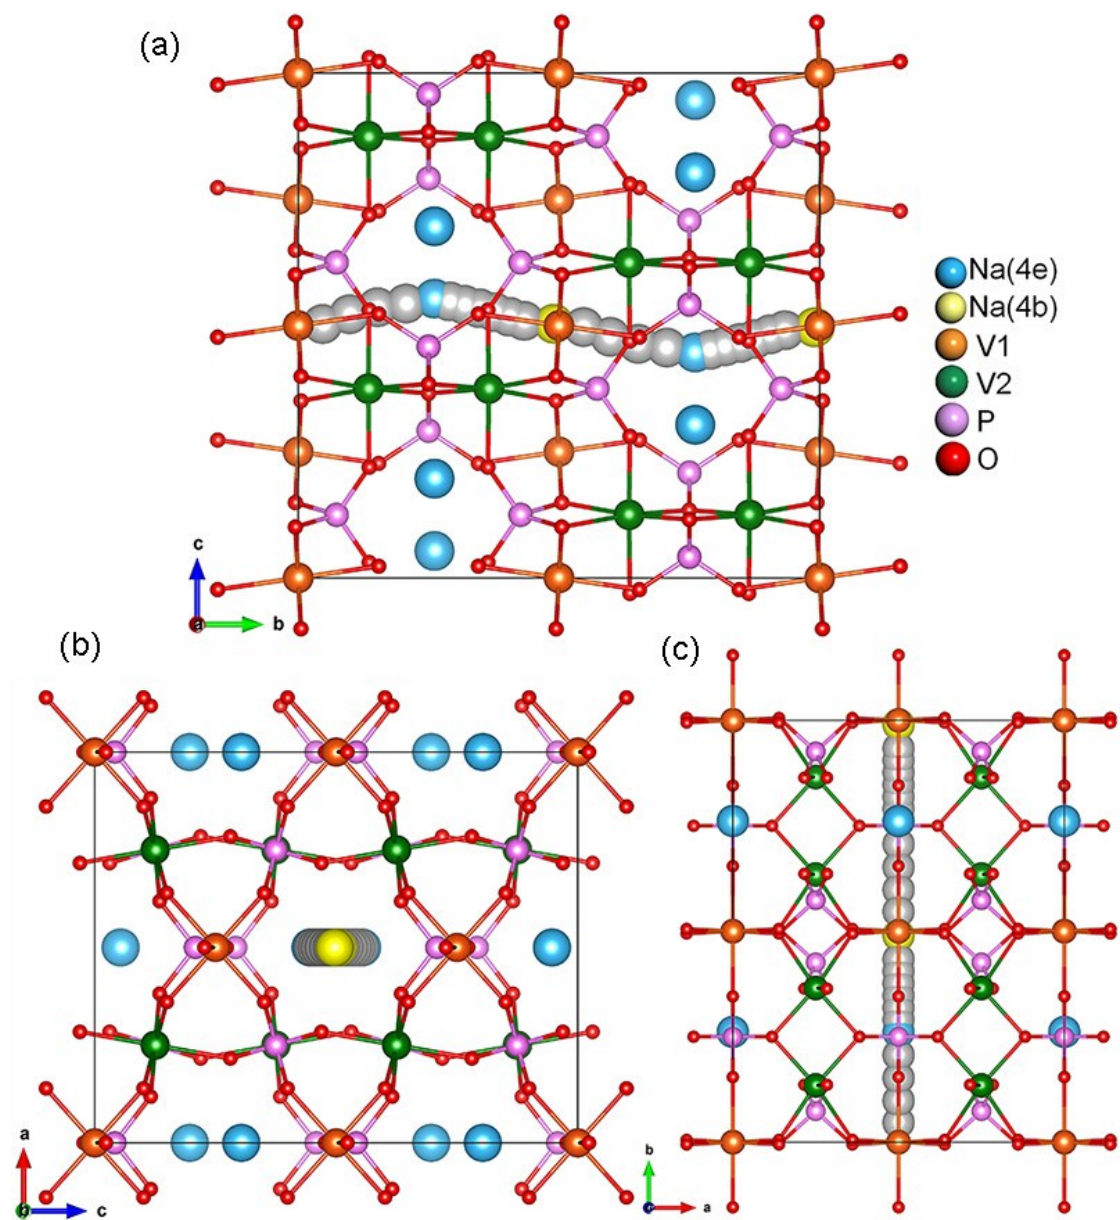

**Figure S5.** The Na transport trajectory in  $\text{Na}_{1.125}\text{V}_3(\text{PO}_4)_3$  are along the channel in *b*-axis direction.

**Table S2** The structural parameters of  $\text{Na}_x\text{V}_3(\text{PO}_4)_3$  ( $x = 1, 2, 3$ ).

|                                        | $a$ (Å) | $b$ (Å) | $c$ (Å) | $\alpha$ (°) | $\beta$ (°) | $\gamma$ (°) | $V$ (Å <sup>3</sup> ) |       |
|----------------------------------------|---------|---------|---------|--------------|-------------|--------------|-----------------------|-------|
| $\text{NaV}_3(\text{PO}_4)_3$          | 10.4882 | 13.2133 | 6.4551  | 90           | 90          | 90           | 894.52                | Expt. |
| $\text{NaV}_3(\text{PO}_4)_3$          | 10.6519 | 13.5714 | 6.5742  | 90           | 90          | 90           | 950.37                | Calc. |
| $\text{Na}_2\text{V}_3(\text{PO}_4)_3$ | 10.8639 | 13.7996 | 6.6141  | 90           | 90          | 90           | 991.58                | Calc. |
| $\text{Na}_3\text{V}_3(\text{PO}_4)_3$ | 10.9273 | 14.4675 | 6.6987  | 90           | 90          | 90           | 1059.0                | Calc. |

**Table S3** The calculated sodium atom of  $\text{Na}_x\text{V}_3(\text{PO}_4)_3$  ( $x = 1, 2, 3$ ) and the corresponding Wyckoff sites (4e, 4b and 4c) coordinates. (*i.e.* the deviation of the sodium atom positions with respect to the Wyckoff sites)

|                                        | Na1 (4e)                 | Na2 (4b)                 | Na3 (4c)                 |       |
|----------------------------------------|--------------------------|--------------------------|--------------------------|-------|
|                                        | (0.0000, 0.2500, 0.4005) | (0.0000, 0.5000, 0.5000) | (0.2500, 0.2500, 0.2500) | Wyc.  |
| $\text{NaV}_3(\text{PO}_4)_3$          | (0.0000, 0.2613, 0.3932) | ---                      | ---                      | Calc. |
| $\text{Na}_2\text{V}_3(\text{PO}_4)_3$ | (0.0000, 0.2483, 0.3648) | (0.0000, 0.4862, 0.4942) | ---                      | Calc. |
| $\text{Na}_3\text{V}_3(\text{PO}_4)_3$ | (0.0000, 0.1779, 0.4385) | (0.0000, 0.4478, 0.4815) | (0.2500, 0.2574, 0.2500) | Calc. |

**Table S4** Distances (Å) between Na atoms in  $\text{Na}_x\text{V}_3(\text{PO}_4)_3$  ( $x = 1, 2, 3$ ).

|                                        | Na1-Na1 (or 4e-4e)<br>(b and a axis direction) | Na1-Na2<br>(or 4e-4b) | Na1-Na3<br>(or 4e-4c) |            |
|----------------------------------------|------------------------------------------------|-----------------------|-----------------------|------------|
| $\text{NaV}_3(\text{PO}_4)_3$          | 6.730, 5.592                                   | 3.365                 | 2.826                 | Expt.-Wyc. |
| $\text{NaV}_3(\text{PO}_4)_3$          | 6.929, 5.649                                   | ---                   | ---                   | Calc.      |
| $\text{Na}_2\text{V}_3(\text{PO}_4)_3$ | 7.128, 5.640                                   | 3.393, 3.735          | ---                   | Calc.      |
| $\text{Na}_3\text{V}_3(\text{PO}_4)_3$ | 7.280, 6.019                                   | 3.372, 3.915          | 3.222                 | Calc.      |
